# Supplementary material for: In vitro effects of two polysaccharide fractions from Laminaria japonica on gut microbiota and metabolome
Source: Royal Society of Chemistry journal article supplement (doi:10.1039/d2fo04085a), 2023-01-01
Supplement: d2fo04085a1.pdf [file d2fo04085a1.pdf]

## Supplementary materials

**Table S1** The basic information of volunteers.

**Fig. S1** The chromatograms of monosaccharide constituents of LLJP and HLJP.

**Fig. S2** The chromatograms of the molecular weight of LLJP and HLJP.

**Fig. S3** The contents of SCFAs in different groups and times during *in vitro* fermentation.

**Fig. S4** The changes in gut microbiota composition. (A) The relative abundance of the main taxa at the phylum level. (B) Firmicutes/Bacteroidetes ratio. \* $p < 0.05$  and \*\* $p < 0.01$ , compared with the HC group. ### $p < 0.01$ , the LLJP group compared with the HLJP group.

**Table S1**

The basic information of volunteers.

|                   | volunteers with hyperlipidemia |      |        |        | healthy volunteers |      |        |        |
|-------------------|--------------------------------|------|--------|--------|--------------------|------|--------|--------|
|                   | male                           | male | female | female | male               | male | female | female |
| Sex               |                                |      |        |        |                    |      |        |        |
| Age               | 34                             | 39   | 35     | 36     | 33                 | 35   | 32     | 36     |
| Height (cm)       | 170                            | 168  | 165    | 162    | 163                | 178  | 158    | 160    |
| Weight (kg)       | 75                             | 66   | 58     | 56     | 62                 | 75   | 50     | 55     |
| TC<br>(mmol/L)    | 6.31                           | 6.03 | 5.26   | 7.14   | 5                  | 4.98 | 4.60   | 3.94   |
| TG<br>(mmol/L)    | 0.87                           | 1.23 | 1.57   | 1.08   | 1.45               | 0.91 | 0.61   | 1.55   |
| HDL-C<br>(mmol/L) | 1.10                           | 1.41 | 1.25   | 1.40   | 1.42               | 1.29 | 1.44   | 1.67   |
| LDL-C<br>(mmol/L) | 4.49                           | 3.91 | 3.45   | 4.90   | 2.70               | 3.20 | 2.56   | 2.36   |

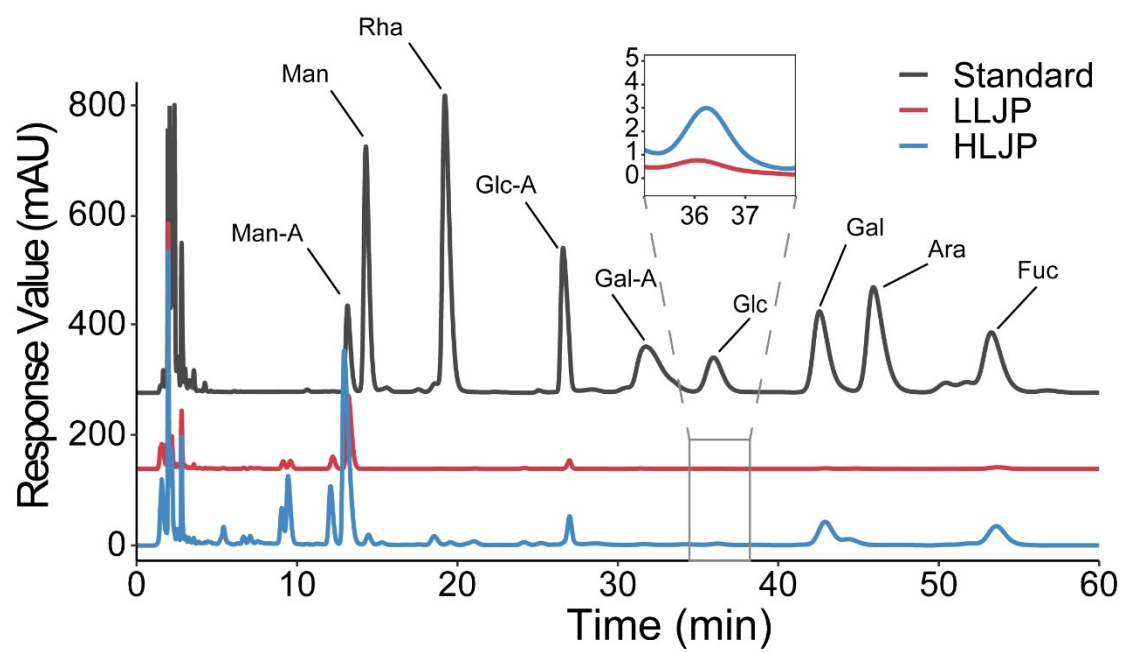

**Fig. S1** The chromatograms of monosaccharide constituents of LLJP and HLJP.

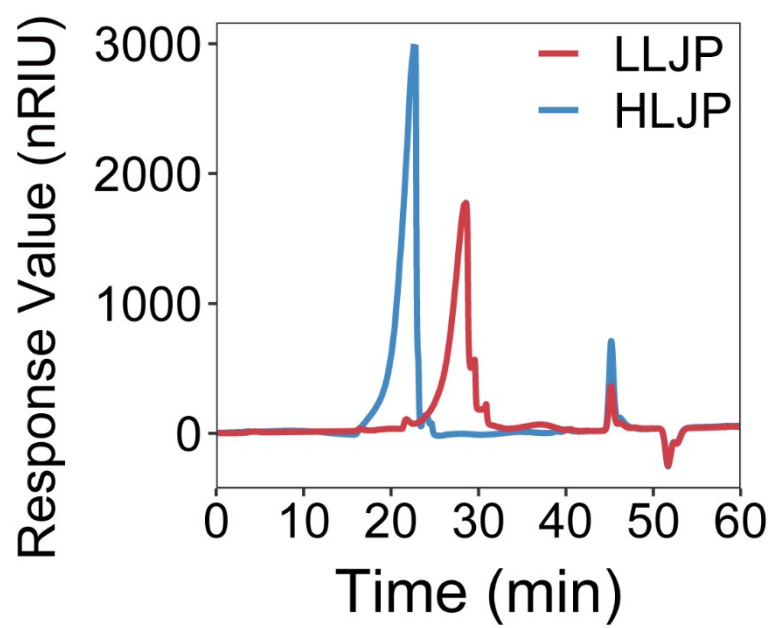

**Fig. S2** The chromatograms of the molecular weight of LLJP and HLJP.

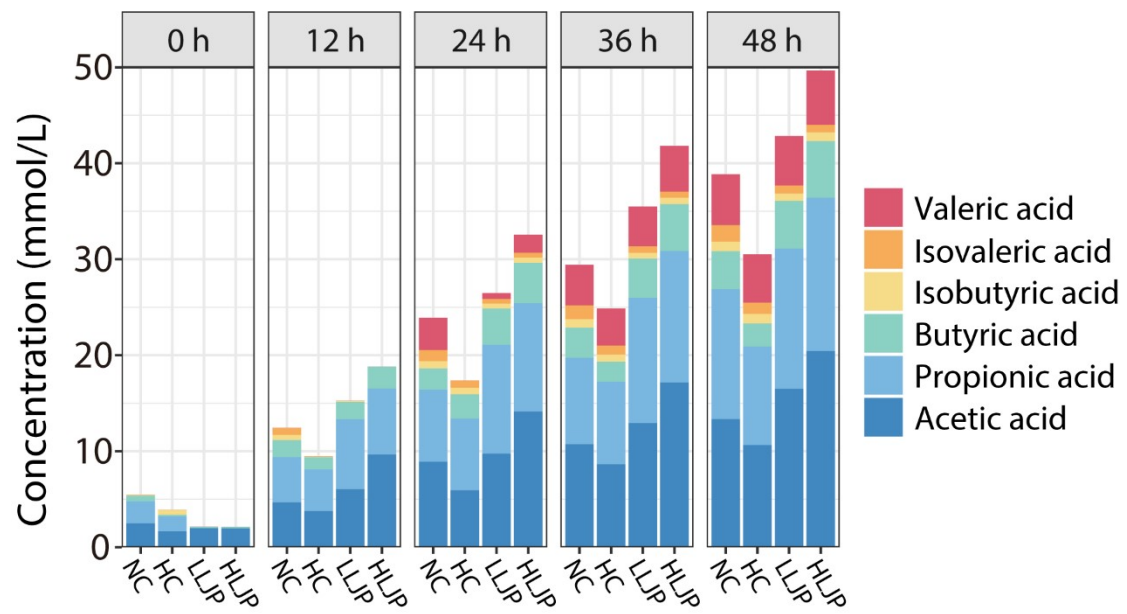

**Fig. S3** The contents of SCFAs in different groups and times during *in vitro* fermentation.

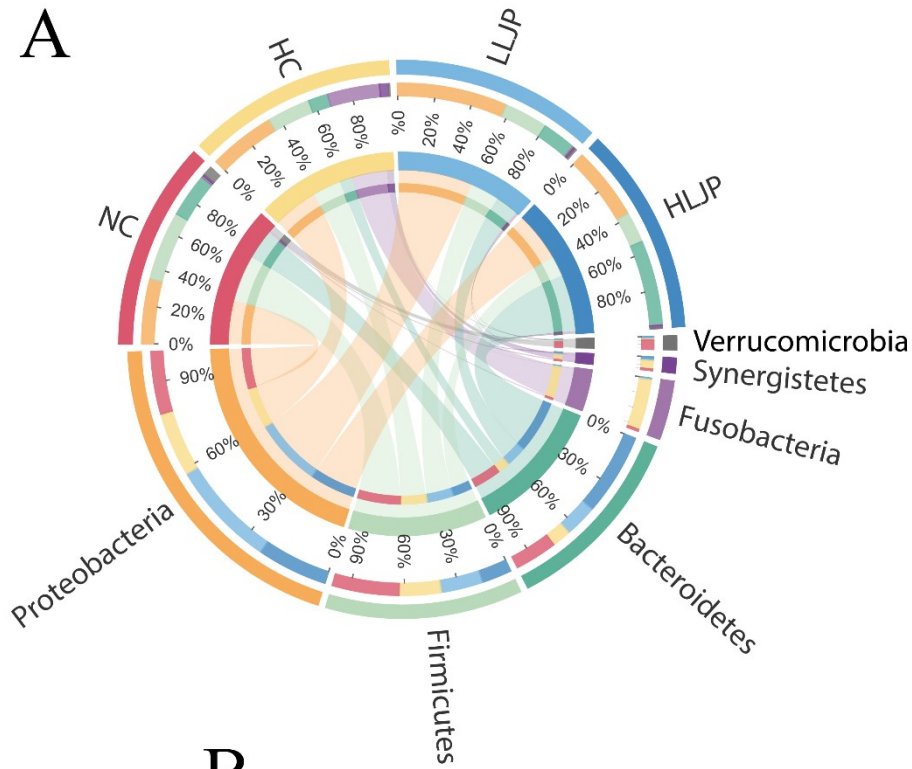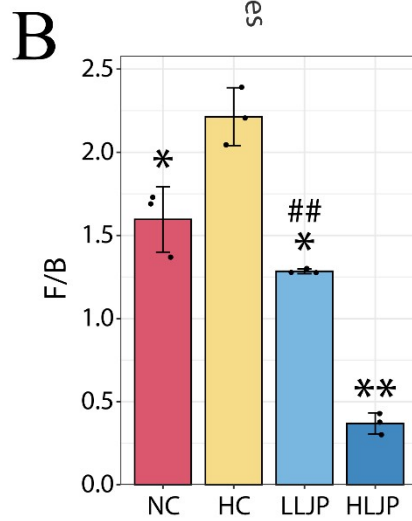

**Fig. S4** The changes in gut microbiota composition. (A) The relative abundance of the main taxa at the phylum level. (B) Firmicutes/Bacteroidetes ratio. \* $p < 0.05$  and \*\* $p < 0.01$ , compared with the HC group. ## $p < 0.01$ , the LLJP group compared with the HLJP group.
